# Supplementary material for: Bias in control selection associated with the use of rapid tests in influenza vaccine effectiveness studies
Source: bioRxiv or medRxiv preprint supplement (doi:10.1101/2024.11.16.24317422), 2024-11-18

# Bias in control selection associated with the use of rapid tests in influenza vaccine effectiveness studies

*Eero Poukka, Caitriona Murphy, Loretta Mak, Samuel M. S. Cheng, Malik Peiris, Tim K. Tsang, Sheena G. Sullivan, Benjamin J. Cowling*

## Contents

|                                                                                                                                                                                            |   |
|--------------------------------------------------------------------------------------------------------------------------------------------------------------------------------------------|---|
| <b>Table S1.</b> Detailed rapid test specification.....                                                                                                                                    | 2 |
| <b>Table S2.</b> Characteristics of participants according to rapid test of influenza A. ....                                                                                              | 3 |
| <b>Table S3.</b> Characteristics of participants according to rapid test of influenza B.....                                                                                               | 4 |
| <b>Table S4.</b> Vaccine effectiveness (VE) against influenza A among participants aged less than 18 years ( $\geq 18$ years) based on PCR or rapid test with 95% confidence interval..... | 5 |
| <b>Table S5.</b> Vaccine effectiveness (VE) against influenza A among participants aged 18 years or more (18 years) based on PCR or rapid test with 95% confidence interval.....           | 6 |
| <b>Figure S1.</b> Study enrolment.....                                                                                                                                                     | 9 |
| <b>Figure S2.</b> Influenza A and B cases over calendar time.....                                                                                                                          | 9 |

**Table S1.** Detailed rapid test specification.

|                                            |                                                                                                                                                                                |
|--------------------------------------------|--------------------------------------------------------------------------------------------------------------------------------------------------------------------------------|
| Assay                                      | SARS-CoV-2 & Influenza A/B & RSV Antigen Kit (Colloidal Gold)                                                                                                                  |
| Manufacturer                               | Goldsite Diagnostics Inc., Shenzhen, China                                                                                                                                     |
| Country of Origin                          | P.R. China                                                                                                                                                                     |
| Certification                              | CE-IVD                                                                                                                                                                         |
| Swab Type                                  | Nasal swab                                                                                                                                                                     |
| Reported Sensitivity and specificity       | SARS-CoV-2: 93.0%; 100%<br>Influenza A: 85.0%; 99.3%<br>Influenza B: 95.0%; 100%<br>RSV: 92.3%; 100%                                                                           |
| Format                                     | Cassette                                                                                                                                                                       |
| Method                                     | Colloidal Gold                                                                                                                                                                 |
| Volume applied into card/cassette          | 2 drops (~60µL)                                                                                                                                                                |
| Incubation                                 | 15 minutes                                                                                                                                                                     |
| Readout                                    | Visual: colored band                                                                                                                                                           |
| Limit of detection                         | SARS-CoV-2: 49 TCID 50/mL Influenza A(H3N2):<br>4.0 x 10 <sup>4</sup> TCID 50/mL<br>Influenza A(H1N1): 2.0 x 10 <sup>4</sup> TCID 50/mL RSV:<br>1.6x10 <sup>4</sup> TCID 50/mL |
| Cross reactivity against other human virus | The results showed no cross reactivity                                                                                                                                         |

**Table S2.** Characteristics of participants according to rapid test of influenza A.

|                                                        | False negative | False positive | True negative | True positive |
|--------------------------------------------------------|----------------|----------------|---------------|---------------|
| <b>N</b>                                               | 97             | 5              | 1,276         | 313           |
| <b>Sex</b>                                             |                |                |               |               |
| Male                                                   | 30             | 2              | 571           | 149           |
| Female                                                 | 67             | 3              | 705           | 164           |
| <b>Age groups</b>                                      |                |                |               |               |
| 0–4                                                    | 5              | 1              | 231           | 54            |
| 5–9                                                    | 9              | 1              | 288           | 54            |
| 10–17                                                  | 13             | 0              | 177           | 46            |
| 18–49                                                  | 47             | 3              | 410           | 108           |
| 50+                                                    | 23             | 0              | 170           | 51            |
| <b>Comorbidities</b>                                   |                |                |               |               |
| Yes                                                    | 11             | 0              | 118           | 25            |
| No                                                     | 86             | 5              | 1,158         | 288           |
| <b>Influenza vaccination for season 2023/24</b>        |                |                |               |               |
| Yes                                                    | 22             | 1              | 496           | 77            |
| No                                                     | 75             | 4              | 807           | 236           |
| <b>Previous season influenza vaccination (2022/23)</b> |                |                |               |               |
| Yes                                                    | 24             | 0              | 421           | 77            |
| No                                                     | 73             | 5              | 855           | 236           |
| <b>Number of COVID-19 vaccinations</b>                 |                |                |               |               |
| 0                                                      | 10             | 1              | 252           | 70            |
| 1–2                                                    | 25             | 0              | 354           | 73            |
| ≥3                                                     | 62             | 4              | 670           | 170           |
| <b>Days since symptom onset</b>                        |                |                |               |               |
| One days                                               | 60             | 3              | 681           | 188           |
| Two days                                               | 9              | 0              | 201           | 57            |
| Three days                                             | 28             | 2              | 394           | 68            |

**Table S3.** Characteristics of participants according to rapid test of influenza B.

|                                                        | False negative | False positive | True negative | True positive |
|--------------------------------------------------------|----------------|----------------|---------------|---------------|
| <b>N</b>                                               | 36             | 1              | 1,512         | 142           |
| <b>Sex</b>                                             |                |                |               |               |
| Male                                                   | 22             | 0              | 663           | 67            |
| Female                                                 | 14             | 1              | 849           | 75            |
| <b>Age groups</b>                                      |                |                |               |               |
| 0–4                                                    | 2              | 0              | 274           | 15            |
| 5–9                                                    | 6              | 1              | 326           | 19            |
| 10–17                                                  | 5              | 0              | 195           | 36            |
| 18–49                                                  | 21             | 0              | 482           | 65            |
| 50+                                                    | 2              | 0              | 235           | 7             |
| <b>Presence of chronic medical conditions</b>          |                |                |               |               |
| Yes                                                    | 3              | 0              | 143           | 8             |
| No                                                     | 33             | 1              | 1,369         | 134           |
| <b>Influenza vaccination for season 2023/24</b>        |                |                |               |               |
| Yes                                                    | 1              | 1              | 544           | 23            |
| No                                                     | 35             | 0              | 968           | 119           |
| <b>Previous season influenza vaccination (2022/23)</b> |                |                |               |               |
| Yes                                                    | 3              | 1              | 495           | 23            |
| No                                                     | 33             | 0              | 1,017         | 119           |
| <b>Number of COVID-19 vaccinations</b>                 |                |                |               |               |
| 0                                                      | 4              | 0              | 313           | 16            |
| 1–2                                                    | 12             | 0              | 399           | 41            |
| ≥3                                                     | 20             | 1              | 800           | 85            |
| <b>Days since symptom onset</b>                        |                |                |               |               |
| One day                                                | 17             | 0              | 852           | 63            |
| Two days                                               | 6              | 1              | 234           | 26            |
| Three days                                             | 13             | 0              | 426           | 53            |

**Table S4.** Vaccine effectiveness (VE) against influenza A among participants aged less than 18 years by PCR or rapid test with 95% confidence interval.

|                                                                                             | <b>VE by PCR<br/>(95% CI)</b> | <b>VE by rapid test<br/>(95% CI)</b> | <b>Bias-corrected VE by<br/>rapid test (95% CI)*</b> | <b>Bias-corrected VE by<br/>rapid test (95% CI)†</b> |
|---------------------------------------------------------------------------------------------|-------------------------------|--------------------------------------|------------------------------------------------------|------------------------------------------------------|
| 1. Exclusion of influenza B and SARS-CoV-2 by PCR<br>(N=738) ‡                              | 55% (30–72%)                  | 53% (24–71%)                         | 55% (33–70%)                                         | 55% (33–70%)                                         |
| 2. Exclusion of influenza B by PCR and adjusting for<br>COVID-19 vaccination (N=796) ‡      | 52% (25–70%)                  | 50% (20–69%)                         | 52% (41–62%)                                         | 53% (42–62%)                                         |
| 3. Exclusion of influenza B by PCR (N=796)                                                  | 52% (25–70%)                  | 51% (21–70%)                         | 53% (8–76%)                                          | 54% (31–69%)                                         |
| 4. All study participants (N=879)                                                           | 47% (17–67%)                  | 46% (13–67%)                         | 48% (14–69%)                                         | 48% (22–65%)                                         |
| 5. Exclusion of influenza B and SARS-CoV-2 by rapid test<br>(N=755)                         | 53% (27–70%)                  | 50% (21–69%)                         | 53% (30–68%)                                         | 53% (30–69%)                                         |
| 6. Exclusion of influenza B by rapid test and adjusting for<br>COVID-19 vaccination (N=808) | 50% (48–86%)                  | 48% (17–68%)                         | 50% (39–59%)                                         | 51% (40–60%)                                         |
| 7. Exclusion of influenza B by rapid test (N=808)                                           | 50% (22–68%)                  | 49% (18–68%)                         | 51% (27–67%)                                         | 51% (27–68%)                                         |

VE = Vaccine effectiveness

\* Diagnostic accuracy estimates based on data from the study participants (sensitivity = 85.1% and specificity = 99.7%)

† Diagnostic accuracy estimates of manufacturer (sensitivity = 85.0% and specificity = 99.3%)

‡ These estimates should be considered the most valid in this table.

**Table S5.** Vaccine effectiveness (VE) against influenza A among participants aged 18 years or more by PCR or rapid test with 95% confidence interval.

|                                                                                          | <b>VE by PCR (95% CI)</b> | <b>VE by rapid test (95% CI)</b> | <b>Bias-corrected VE by rapid test (95% CI)*</b> | <b>Bias-corrected VE by rapid test (95% CI)†</b> |
|------------------------------------------------------------------------------------------|---------------------------|----------------------------------|--------------------------------------------------|--------------------------------------------------|
| 1. Exclusion of influenza B and SARS-CoV-2 by PCR (N=576) ‡                              | 38% (-21–69%)             | 26% (-53–65%)                    | 31% (-17–69%)                                    | 28% (-16–55%)                                    |
| 2. Exclusion of influenza B by PCR and adjusting for COVID-19 vaccination (N=717) ‡      | 41% (-10–69%)             | 32% (-35–67%)                    | 37% (5–58%)                                      | 35% (12–53%)                                     |
| 3. Exclusion of influenza B by PCR (N=717)                                               | 41% (-9–69%)              | 31% (-38–66%)                    | 36% (-128–82%)                                   | 34% (-4–58%)                                     |
| 4. All study participants (N=812)                                                        | 37% (-19–67%)             | 26% (-50–65%)                    | 29% (-51–66%)                                    | 28% (-12–54%)                                    |
| 5. Exclusion of influenza B and SARS-CoV-2 by rapid test (N=615)                         | 37% (-21–68%)             | 26% (-52–65%)                    | 31% (-19–60%)                                    | 27% (-17–55%)                                    |
| 6. Exclusion of influenza B by rapid test and adjusting for COVID-19 vaccination (N=740) | 39% (-14–68%)             | 30% (-40–66%)                    | 34% (2–56%)                                      | 33% (7–51%)                                      |
| 7. Exclusion of influenza B by rapid test (N=740)                                        | 39% (-14–68%)             | 29% (-43–65%)                    | 34% (-11–60%)                                    | 31% (-8–56%)                                     |

VE = Vaccine effectiveness

\* Diagnostic accuracy estimates based on data from the study participants (sensitivity = 69.4% and specificity = 99.5%)

† Diagnostic accuracy estimates of manufacturer (sensitivity = 85.0% and specificity = 99.3%)

‡ These estimates should be considered the most valid in this table.

**Table S6.** Vaccine effectiveness (VE) against influenza A by PCR or rapid test with 95% confidence interval during H3N2 predominance (December 2023 – February 2024).

|                                                                                          | <b>VE by PCR (95% CI)</b> | <b>VE by rapid test (95% CI)</b> | <b>Bias-corrected VE by rapid test (95% CI)*</b> | <b>Bias-corrected VE by rapid test (95% CI)†</b> |
|------------------------------------------------------------------------------------------|---------------------------|----------------------------------|--------------------------------------------------|--------------------------------------------------|
| 1. Exclusion of influenza B and SARS-CoV-2 by PCR (N=751) ‡                              | 59% (31–76%)              | 54% (20–77%)                     | 58% (35–73%)                                     | 57% (35–72%)                                     |
| 2. Exclusion of influenza B by PCR and adjusting for COVID-19 vaccination (N=871) ‡      | 56% (27–74%)              | 52% (18–73%)                     | 57% (43–67%)                                     | 55% (42–66%)                                     |
| 3. Exclusion of influenza B by PCR (N=871)                                               | 58% (29–75%)              | 53% (19–73%)                     | 57% (18–77%)                                     | 56% (34–71%)                                     |
| 4. All study participants (N=920)                                                        | 56% (27–74%)              | 52% (17–73%)                     | 55% (19–75%)                                     | 54% (31–70%)                                     |
| 5. Exclusion of influenza B and SARS-CoV-2 by rapid test (N=778)                         | 58% (30–76%)              | 53% (19–74%)                     | 57% (34–72%)                                     | 57% (34–72%)                                     |
| 6. Exclusion of influenza B by rapid test and adjusting for COVID-19 vaccination (N=882) | 55% (26–74%)              | 51% (16–72%)                     | 55% (40–66%)                                     | 54% (41–64%)                                     |
| 7. Exclusion of influenza B by rapid test (N=882)                                        | 57% (13–73%)              | 52% (18–73%)                     | 56% (33–71%)                                     | 55% (33–70%)                                     |

VE = Vaccine effectiveness

\* Diagnostic accuracy estimates based on data from the study participants (sensitivity = 76.3% and specificity = 99.6%)

† Diagnostic accuracy estimates of manufacturer (sensitivity = 85.0% and specificity = 99.3%)

‡ These estimates should be considered the most valid in this table.

**Table S7.** Vaccine effectiveness (VE) against influenza A by PCR or rapid test with 95% confidence interval during H1N1 predominance (March – August 2024).

|                                                                                          | <b>VE by PCR (95% CI)</b> | <b>VE by rapid test (95% CI)</b> | <b>Bias-corrected VE by rapid test (95% CI)*</b> | <b>Bias-corrected VE by rapid test (95% CI)†</b> |
|------------------------------------------------------------------------------------------|---------------------------|----------------------------------|--------------------------------------------------|--------------------------------------------------|
| 1. Exclusion of influenza B and SARS-CoV-2 by PCR (N=563) ‡                              | 33% (-14–61%)             | 30% (-25–61%)                    | 33% (-8–59%)                                     | 32% (-8–57%)                                     |
| 2. Exclusion of influenza B by PCR and adjusting for COVID-19 vaccination (N=642) ‡      | 34% (-10–61%)             | 32% (-21–62%)                    | 35% (11–52%)                                     | 33% (12–48%)                                     |
| 3. Exclusion of influenza B by PCR (N=642)                                               | 33% (-12–61%)             | 29% (-25–61%)                    | 33% (-24–64%)                                    | 32% (-8–57%)                                     |
| 4. All study participants (N=771)                                                        | 21% (-34–54%)             | 17% (-48–54%)                    | 19% (-49–56%)                                    | 18% (-26–47%)                                    |
| 5. Exclusion of influenza B and SARS-CoV-2 by rapid test (N=)                            | 29% (-20–58%)             | 26% (-32–59%)                    | 29% (-15–56%)                                    | 27% (-16–54%)                                    |
| 6. Exclusion of influenza B by rapid test and adjusting for COVID-19 vaccination (N=666) | 30% (-17–59%)             | 27% (-29–60%)                    | 30% (5–48%)                                      | 29% (9–45%)                                      |
| 7. Exclusion of influenza B by rapid test (N=666)                                        | 29% (-20–58%)             | 25% (-32–58%)                    | 28% (-15–54%)                                    | 27% (-13–53%)                                    |

VE = Vaccine effectiveness

\* Diagnostic accuracy estimates based on data from the study participants (sensitivity = 76.3% and specificity = 99.6%)

† Diagnostic accuracy estimates of manufacturer (sensitivity = 85.0% and specificity = 99.3%)

‡ These estimates should be considered the most valid in this table.



Figure S1. Study enrolment.

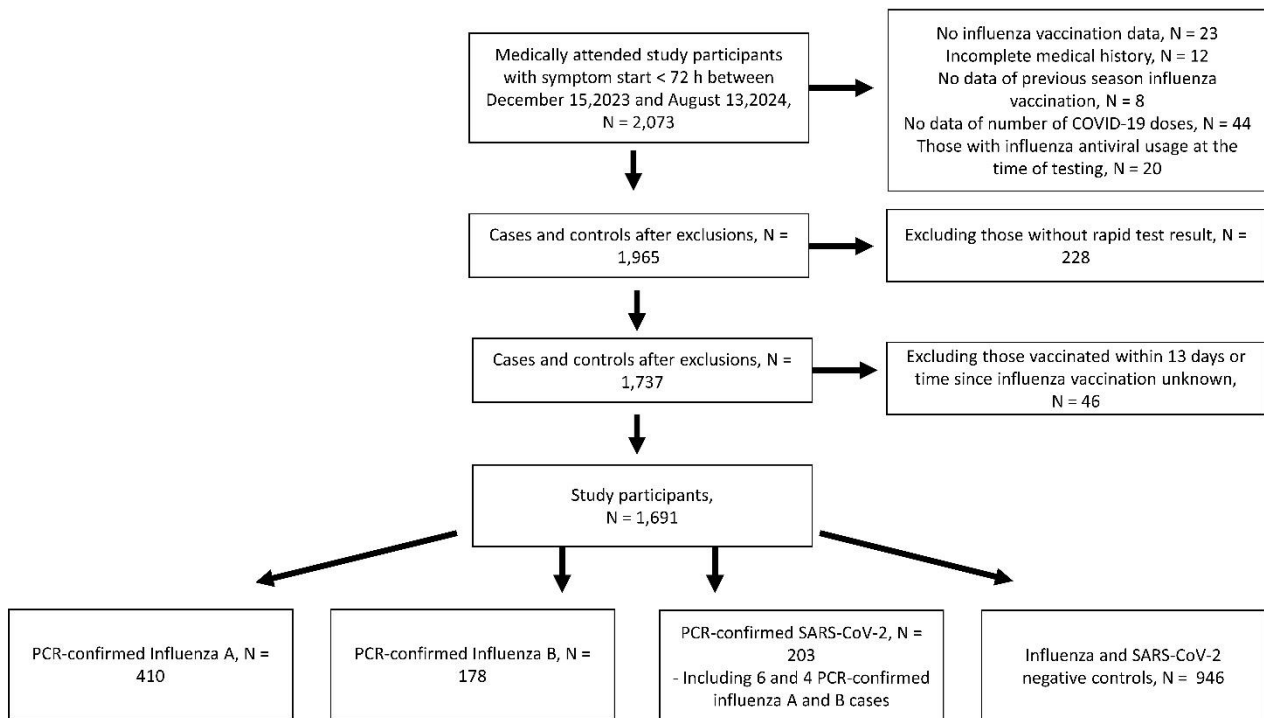

Figure S2. Influenza A and B cases over calendar time

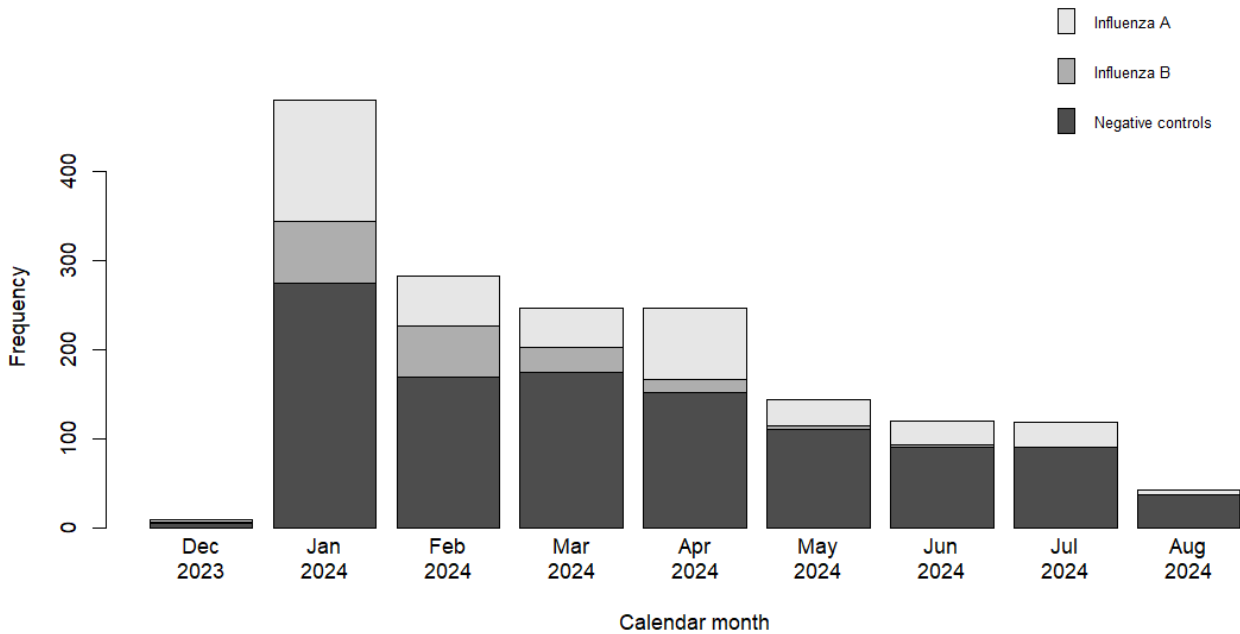

Supplement: Supplementary file [file media-1.pdf]
